# Supplementary material
Source: Royal Society of Chemistry journal article supplement (doi:10.1039/d6nr00988c)
Supplement: d6nr00988c1.pdf [file d6nr00988c1.pdf]

*Supplementary Information for*

Critical Interplay of Defect Engineering and  
Plasmonics in Hybrid Nanostructures for  
Ultrasensitive Photo-Enhanced Raman Spectroscopy

*Arti Sharma<sup>1,‡</sup>, Shubhadip Atta<sup>2,‡</sup>, Shubham Sharma<sup>3</sup>, Prashant Mishra<sup>3</sup>, Soutik Betal<sup>2\*</sup>, Soumik  
Siddhanta<sup>1\*</sup>*

1. Department of Chemistry, Indian Institute of Technology Delhi, Hauz Khas, New Delhi,  
110016, India

2. Department of Electrical Engineering, Indian Institute of Technology Delhi, Hauz Khas, New  
Delhi, 110016, India

3. Department of Biochemical Engineering and Biotechnology, Indian Institute of Technology  
Delhi, Hauz Khas, New Delhi, 110016, India

<sup>‡</sup>Arti and Shubhadip Shared first authorship (both authors contributed equally to the manuscript)

\*Corresponding authors: [soumik@iitd.ac.in](mailto:soumik@iitd.ac.in), [soutik@ee.iitd.ac.in](mailto:soutik@ee.iitd.ac.in)

# Table of Contents

**Enhancement Factor (EF) Calculation** 3

**Calculation of Energy levels for Titanium oxide from XPS** 3

**Tables** 4

Table 1: Shows the enhancement factor of both SERS and PIERS

Table 2: Raman peaks corresponding to different phases of TiO<sub>2</sub>

Table 3: Tentative Raman vibrational mode assignment of the R6G molecule

Table 4: XPS fitting results of Titanium 2p spectra

Table 5: Surface Reduction Quantification in TiO<sub>2</sub> Samples Using Ti 2p XPS Peak Areas

Table 6: Quantitative analysis of oxygen vacancy concentration in TiO<sub>2</sub> samples obtained from O 1s XPS peak deconvolution.

**Figures** 7-15

**Figure S1.** A) Shows the plasmonic peak for AgNPs at 441 nm. B) Shows the AgNPs size with the Nanoparticle tracking analyzer. C) Show the TEM image of the AgNPs at a 100 nm scale. D) size distribution analysis of the AgNPs analyzed using the ImageJ software.

**Figure S2.** (A, B) Shows the Scanning electron microscope images of synthesized TiO<sub>2</sub> (USP\_700), (C) TiO<sub>2</sub> (Sol\_700), and (D) TiO<sub>2</sub> (Sol\_500).

**Figure S3.** EPR spectra of TiO<sub>2</sub> (Sol-500), TiO<sub>2</sub> (Sol-700), and TiO<sub>2</sub> (USP-700) are shown in black, red, and blue, respectively.

**Figure S4.** Characteristic Raman fingerprint region of the R6G molecule.

**Figure S5.** (A, B) Shows the Raman spectrum of the R6G molecule at a concentration of 10<sup>-7</sup> M for non-UV irradiated and after UV irradiation of the TiO<sub>2</sub> (S\_500) sample. (C) Shows the overlaid Raman spectrum of TiO<sub>2</sub> (S\_700) to show the intensity difference before and after UV irradiation. (D, E) Shows the Raman spectrum of the R6G molecule at a concentration of 10<sup>-7</sup> M for non-UV irradiation and after UV irradiation of the TiO<sub>2</sub> (S\_700) sample. (F) Shows the overlapped Raman spectrum of TiO<sub>2</sub> (S\_700) to show the intensity difference before and after UV irradiation. (G, H) Shows the Raman spectrum of the R6G molecule at a concentration of 10<sup>-7</sup> M for non-UV irradiated and after UV irradiation of the TiO<sub>2</sub> (USP\_700) sample. (I) Shows the overlapped Raman spectrum of TiO<sub>2</sub> (USP\_700) to show the intensity difference before and after UV irradiation.

**Figure S6.** Shows the enhancement factor for TiO<sub>2</sub>(S\_500), TiO<sub>2</sub>(S\_700), and TiO<sub>2</sub>(USP\_700) based on the calculation done in Table 1.

**Figure S7.** Shows the Raman spectrum for the R6G at 10<sup>-5</sup> M concentration for differently synthesized TiO<sub>2</sub> samples in the following order: TiO<sub>2</sub>-R6G (Pink), TiO<sub>2</sub>\_R6G\_UV irradiated (brick red), TiO<sub>2</sub>\_AgNPs\_R6G (Orange), TiO<sub>2</sub>\_AgNPs\_R6G\_UV irradiated (violet).

**Figure S8.** Valence band XPS spectra of TiO<sub>2</sub>\_500, TiO<sub>2</sub>\_700, and TiO<sub>2</sub>\_USP samples. The valence band edge was determined by extrapolating the linear portion of the leading edge to the baseline. The extracted VBM values are 2.46 eV for TiO<sub>2</sub>\_500, 2.33 eV for TiO<sub>2</sub>\_700, and 2.69 eV for TiO<sub>2</sub>\_USP, showing a clear shift in electronic states depending on the synthesis and treatment conditions.

# Enhancement Factor Calculation

The enhancement factor (EF) for surface-enhanced Raman spectroscopy (SERS) and photoinduced enhanced Raman spectroscopy (PIERS) was calculated using the following expression, as also done elsewhere<sup>1</sup>

$$EF_{SERS}(\omega_\nu) = \frac{I_{SERS}}{I_{Raman}} \times \frac{N_{Bulk}}{N_{surface}}$$

$$EF_{PIERS}(\omega_\nu) = \frac{I_{PIERS}}{I_{Raman}} \times \frac{N_{Bulk}}{N_{surface}}$$

Where  $N_{bulk}$  and  $N_{surface}$  are given as:

$$N_{bulk} \text{ can be given as } \frac{A_{laser} \times h \times \rho}{M} * N_A$$

$$N_{surface} \text{ can be given as } \frac{C \times V}{A_{substrate}} * N_A * A_{laser}$$

$A_{laser}$  is the area of the laser spot ( $1.445 \times 10^{-7} \text{ cm}^2$ ),

$h$  is the focal depth of the laser (0.03 cm),

$\rho$  is the density of the analyte ( $1.26 \text{ g cm}^{-3}$ ),

$M$  is the molecular weight of the analyte ( $479.02 \text{ g mol}^{-1}$ ), and

$N_A$  is Avogadro's number ( $6.022 \times 10^{23} \text{ mol}^{-1}$ ).

$C$  is the molar concentration of the analyte (either  $10^{-7}$  or  $10^{-5} \text{ mol L}^{-1}$ ),

$V$  is the volume of the analyte solution used ( $10 \text{ }\mu\text{L}$  or  $1 \times 10^{-5} \text{ L}$ ),

$A_{substrate}$  is the area of the substrate ( $0.2513 \text{ cm}^2$ )

## Calculation of Energy levels for Titanium oxide from XPS

The Valence Band Maximum (VBM) was initially determined through a linear extrapolation of the  $\text{TiO}_2$  XPS valence band leading edge to the baseline. This method provided binding energy relative to the Fermi level. To convert the valence band edge to the absolute vacuum energy scale, a work function ( $\phi$ ) of 5 eV was utilized. This approach enabled the calculation of the absolute valence band maximum energy relative to the vacuum energy. The position of the Conduction Band minimum was then determined by adding the optical band gap to the previously obtained value.

$$E_{\text{Valence band maxima}} = \phi - BE_{\text{Valence band maxima}}$$

# Tables

**Table S1: Shows the enhancement factor of both SERS and PIERS**

| Sample                      | Raman Intensity (a.u.) | SERS Intensity | EF                     | PIERS Intensity | EF                     | PIERS/SERS |
|-----------------------------|------------------------|----------------|------------------------|-----------------|------------------------|------------|
| Sol_500 (10 <sup>-7</sup> ) | 27.4                   | 95             | 5.43 x 10 <sup>7</sup> | 600             | 4.34 x 10 <sup>8</sup> | 6.32       |
| Sol_700 (10 <sup>-7</sup> ) |                        | 75             | 6.88 x 10 <sup>7</sup> | 418.23          | 3.03 x 10 <sup>8</sup> | 5.58       |
| USP_700 (10 <sup>-7</sup> ) |                        | 25             | 1.81 x 10 <sup>7</sup> | 35              | 2.53 x 10 <sup>7</sup> | 1.40       |
| Sol_500 (10 <sup>-5</sup> ) | 177                    | 490            | 5.49 x 10 <sup>5</sup> | 2450            | 2.74 x 10 <sup>6</sup> | 5.00       |
| Sol_700 (10 <sup>-5</sup> ) |                        | 580            | 6.50 x 10 <sup>5</sup> | 1700            | 1.90 x 10 <sup>6</sup> | 2.93       |
| USP_700 (10 <sup>-5</sup> ) |                        | 900            | 1.01 x 10 <sup>6</sup> | 100             | 1.12 x 10 <sup>5</sup> | 0.11       |

**Table S2: Raman peaks corresponding to different phases of TiO<sub>2</sub>**

| Phase (Space Group)                      | Raman Shift (cm <sup>-1</sup> ) | Symmetry Mode   |
|------------------------------------------|---------------------------------|-----------------|
| <b>Anatase</b><br>(I4 <sub>1</sub> /amd) | 144                             | E <sub>g</sub>  |
|                                          | 397                             | B <sub>1g</sub> |
|                                          | 513                             | A <sub>1g</sub> |
|                                          | 519                             | B <sub>1g</sub> |
|                                          | 639                             | E <sub>g</sub>  |
| <b>Rutile</b><br>(P4 <sub>2</sub> /mnm)  | 147                             | B <sub>1g</sub> |
|                                          | 240                             | Multi-phonon    |
|                                          | 438                             | E <sub>g</sub>  |
|                                          | 612                             | A <sub>1g</sub> |
|                                          | 810                             | B <sub>2g</sub> |

**Table S3: Tentative Raman vibrational mode assignment of the R6G molecule**

| Raman shift<br>(cm <sup>-1</sup> ) | Tentative Raman vibrational modes of proteins <sup>2</sup><br>3, 4 |
|------------------------------------|--------------------------------------------------------------------|
| 612                                | in-plane bending ring vibration (C-C-C)                            |
| 773                                | Aromatic C-H out-of-plane bending                                  |
| 1127                               | Aromatic C-H in-plane bending                                      |
| 1180                               | C-C stretching coupled with C-H bending                            |
| 1311                               | C-N (xanthene ring)                                                |
| 1363                               | C-C stretching (Aromatic)                                          |
| 1514                               | C-C stretching (Aromatic)                                          |
| 1656                               | C-C stretching (Aromatic)                                          |

**Table S4: XPS fitting results of Titanium 2p spectra**

| Sample                     | Full-width half maxima Ti <sup>4+</sup> 2p <sub>1/2</sub> | Full-width half-maxima Ti <sup>4+</sup> 2p <sub>3/2</sub> | Area of Ti <sup>4+</sup> 2p <sub>3/2</sub> | Area of Ti <sup>4+</sup> 2p <sub>3/2</sub> value | Area Ratio of 2P <sub>3/2</sub> : 2P <sub>1/2</sub> | Ti <sup>4+</sup> 2p <sub>1/2</sub> - Ti <sup>4+</sup> 2p <sub>3/2</sub> Splitting |
|----------------------------|-----------------------------------------------------------|-----------------------------------------------------------|--------------------------------------------|--------------------------------------------------|-----------------------------------------------------|-----------------------------------------------------------------------------------|
| TiO <sub>2</sub> (Sol-500) | 1.65393853737                                             | 0.89868691882                                             | 17561.016647                               | 8904.90773906                                    | 1.97                                                | 5.55 eV                                                                           |
| TiO <sub>2</sub> (USP-700) | 1.68459117722                                             | 0.89572283920                                             | 25300.1248845                              | 12644.7638581                                    | 2.00                                                | 5.90 eV                                                                           |
| TiO <sub>2</sub> (Sol-700) | 1.65486711857                                             | 0.89736067199                                             | 16564.7253282                              | 8912.8586158                                     | 1.85                                                | 5.54 eV                                                                           |

**Table S5: Surface reduction quantification in TiO<sub>2</sub> samples using Ti 2p XPS peak areas**

| Sample                     | Ti <sup>3+</sup> 2p <sub>3/2</sub> Area | Ti <sup>4+</sup> 2p <sub>3/2</sub> Area | Ti <sup>3+</sup> Fraction (%) |
|----------------------------|-----------------------------------------|-----------------------------------------|-------------------------------|
| TiO <sub>2</sub> (Sol-500) | 5554.44                                 | 17561.02                                | 24.03%                        |
| TiO <sub>2</sub> (Sol-700) | 4031.69                                 | 16564.73                                | 19.58%                        |
| TiO <sub>2</sub> (USP-700) | absent                                  | 25,300.12                               | -                             |

**Table S6: Quantitative analysis of oxygen vacancy concentration in TiO<sub>2</sub> samples obtained from O 1s XPS peak deconvolution.**

| <b>Sample</b>                           | <b>Lattice O (O<sup>2-</sup>) Binding Energy (eV)</b> | <b>Area</b> | <b>Oxygen Vacancy (O<sub>v</sub>) Binding Energy (eV)</b> | <b>Area</b> | <b>Surface –OH Binding Energy (eV)</b> | <b>Area</b> | <b>Oxygen Defect Fraction (%)</b> |
|-----------------------------------------|-------------------------------------------------------|-------------|-----------------------------------------------------------|-------------|----------------------------------------|-------------|-----------------------------------|
| <b>TiO<sub>2</sub> (Sol-gel, 700°C)</b> | 529.5                                                 | 15635.488   | 530.3                                                     | 15799.10    | 531.8                                  | 2648.814    | 46.35                             |
| <b>TiO<sub>2</sub> (Sol-gel, 500°C)</b> | 529.5                                                 | 11625.943   | 530.2                                                     | 19264.04    | 532.2                                  | 2370.035    | 57.92                             |
| <b>TiO<sub>2</sub> (USP, 700°C)</b>     | 529.8                                                 | 33691.154   | -                                                         | -           | 531.7                                  | 18640.81    | -                                 |

# Figures

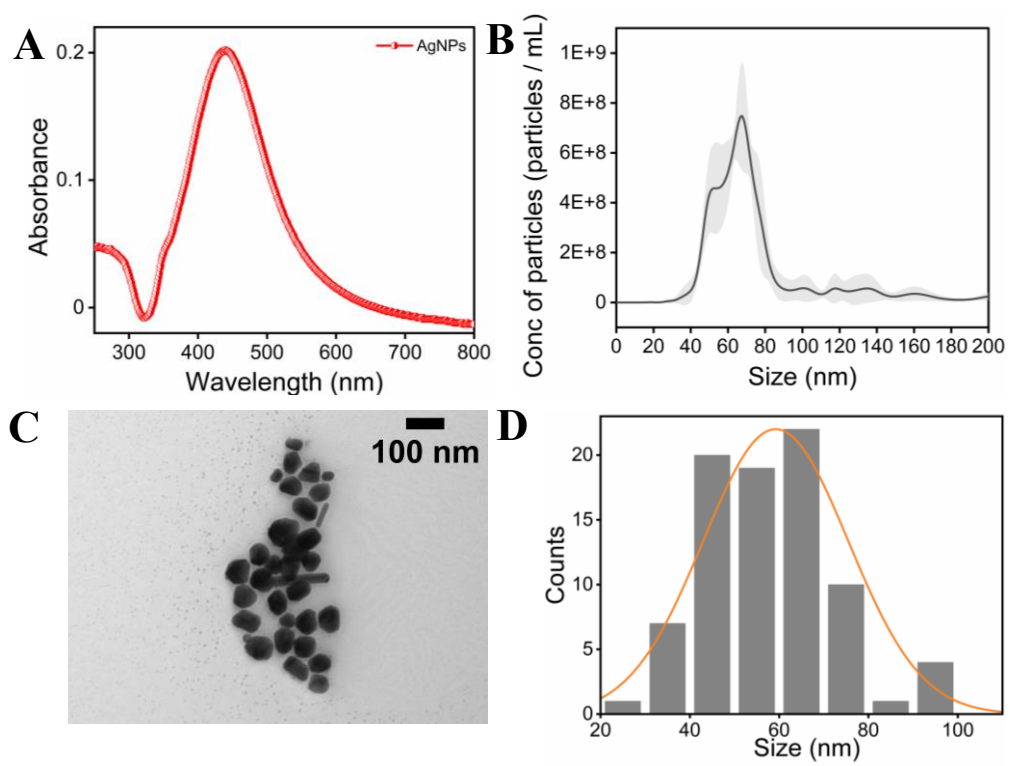

**Figure S1.** A) Shows the plasmonic peak for AgNPs at 441 nm. B) Shows the average size of AgNPs with the Nanoparticle tracking analyzer. C) Show the TEM image of the AgNPs at a 100 nm scale. D) size distribution analysis of the AgNPs analyzed using the ImageJ software.

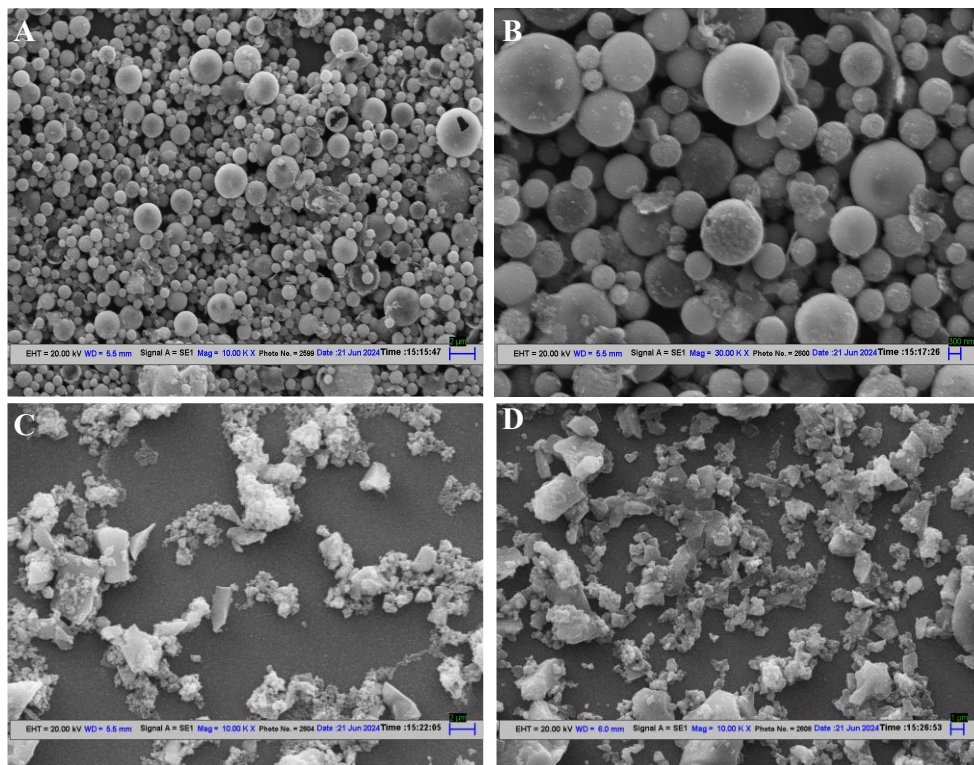

**Figure S2.** (A, B) Shows the Scanning electron microscope (SEM) images of synthesized TiO<sub>2</sub> (USP\_700), (C) TiO<sub>2</sub> (Sol\_700), and (D) TiO<sub>2</sub> (Sol\_500).

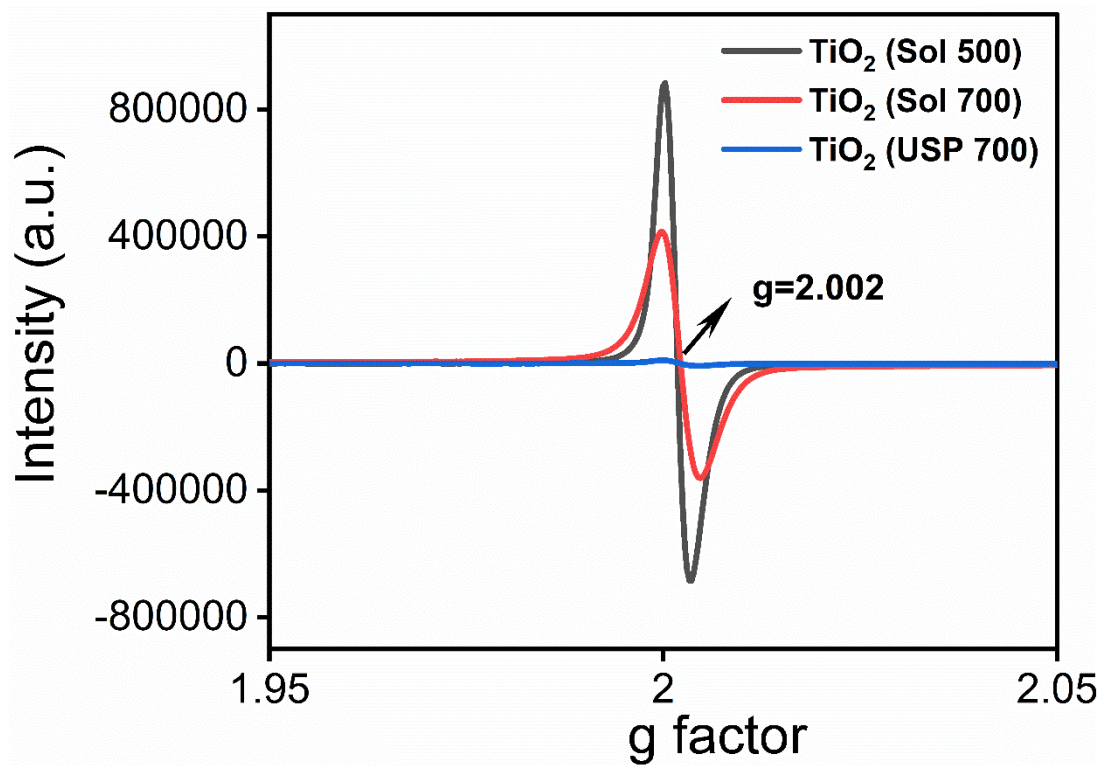

**Figure S3.** EPR spectra of TiO<sub>2</sub> (Sol-500), TiO<sub>2</sub> (Sol-700), and TiO<sub>2</sub> (USP-700) are shown in black, red, and blue, respectively.

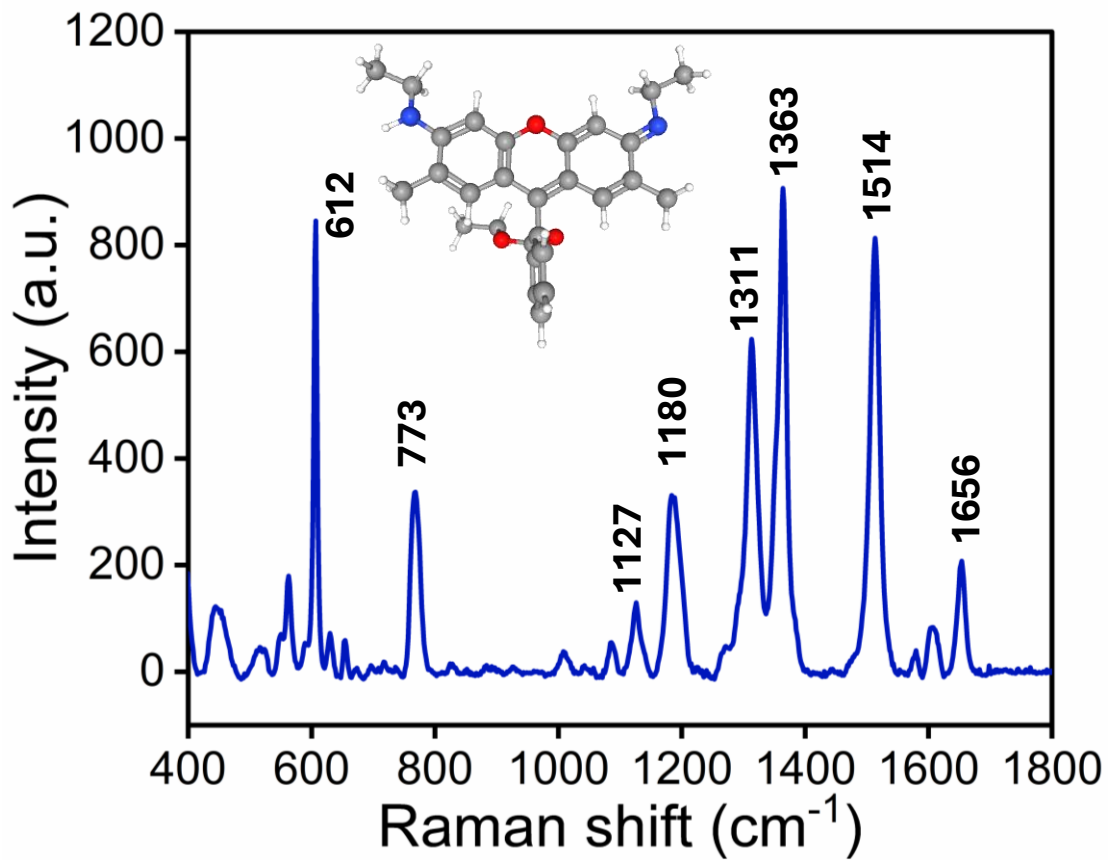

Figure S4. Characteristic Raman fingerprint region of the R6G molecule.

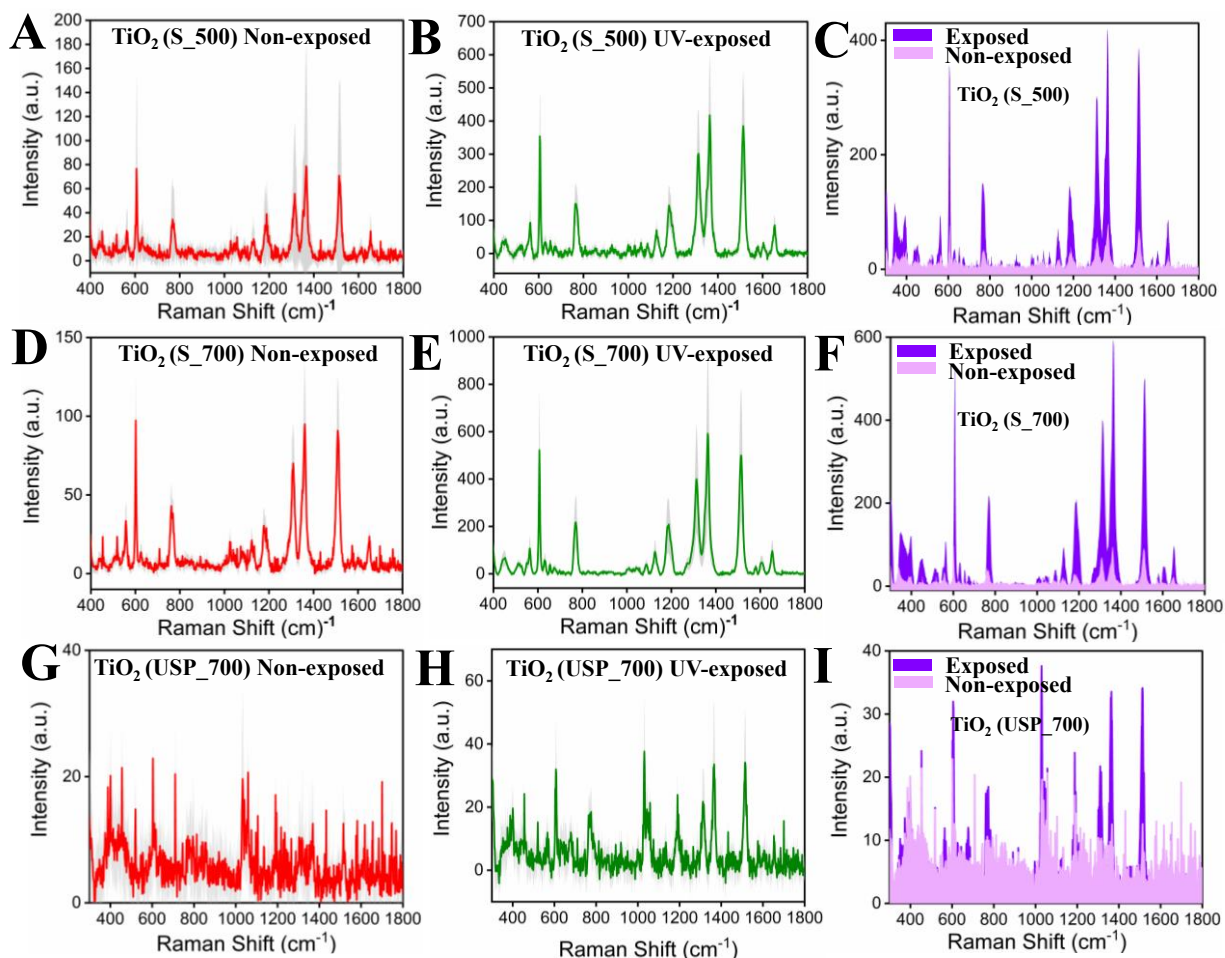

**Figure S5.** (A, B) Shows the Raman spectrum of the R6G molecule at a concentration of  $10^{-7}$  M for non-UV irradiated and after UV irradiation of the  $\text{TiO}_2$  (S\_500) sample. (C) Shows the overlaid Raman spectrum of  $\text{TiO}_2$  (S\_500) to show the intensity difference before and after UV irradiation. (D, E) Shows the Raman spectrum of the R6G molecule at a concentration of  $10^{-7}$  M for non-UV irradiation and after UV irradiation of the  $\text{TiO}_2$  (S\_700) sample. (F) Shows the overlaid Raman spectrum of  $\text{TiO}_2$  (S\_700) to show the intensity difference before and after UV irradiation. (G, H) Shows the Raman spectrum of the R6G molecule at a concentration of  $10^{-7}$  M for non-UV irradiated and after UV irradiation of the  $\text{TiO}_2$  (USP\_700) sample. (I) Shows the overlaid Raman spectrum of  $\text{TiO}_2$  (USP\_700) to show the intensity difference before and after UV irradiation.

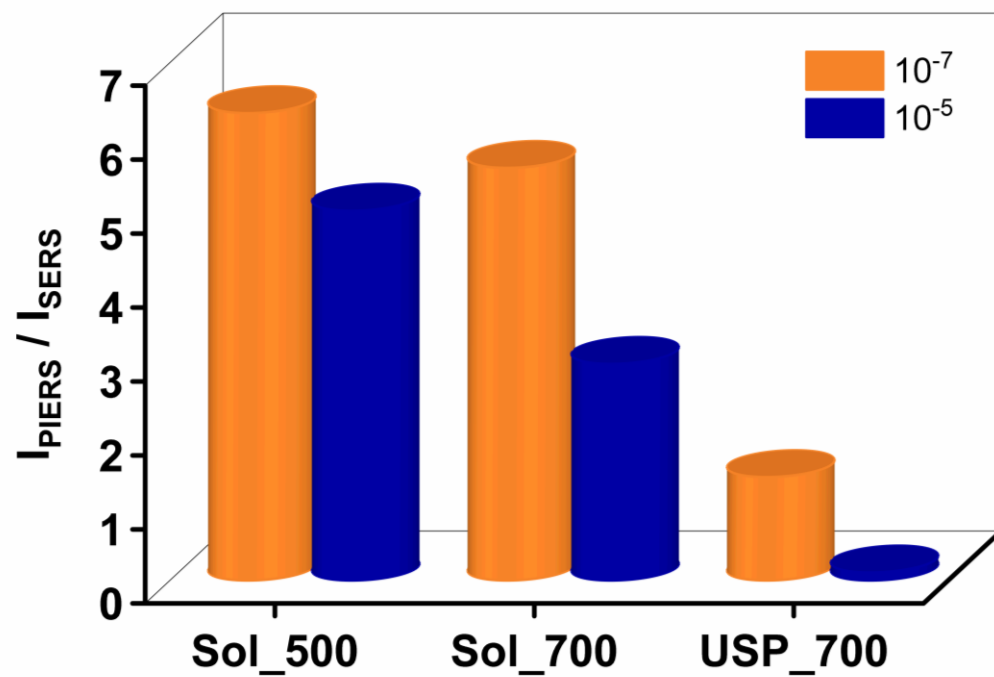

**Figure S6.** Shows the enhancement factor for  $\text{TiO}_2(\text{S}_{500})$ ,  $\text{TiO}_2(\text{S}_{700})$ , and  $\text{TiO}_2(\text{USP}_{700})$  based on the calculation done in Table 1.

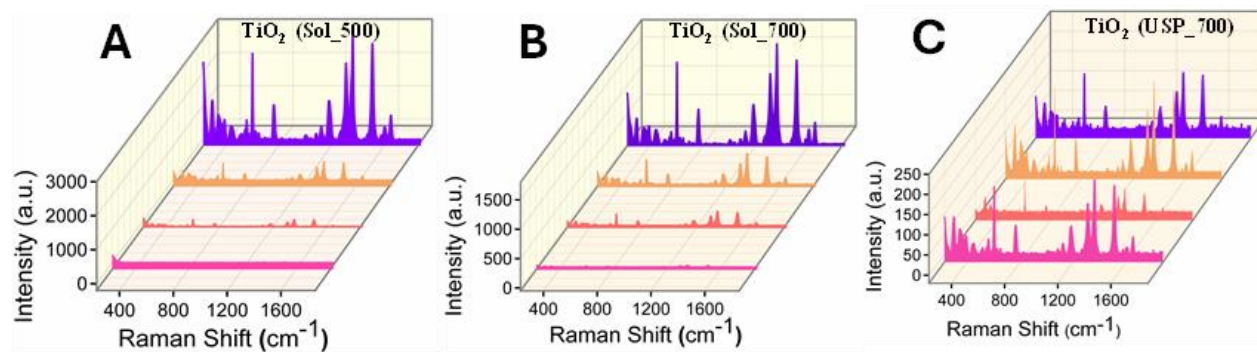

**Figure S7.** Shows the Raman spectrum for the R6G at  $10^{-5}$  M concentration for differently synthesized  $\text{TiO}_2$  samples in the following order:  $\text{TiO}_2$ -R6G (Pink),  $\text{TiO}_2$ \_R6G\_UV irradiated (brick red),  $\text{TiO}_2$ \_AgNPs\_R6G (Orange),  $\text{TiO}_2$ \_AgNPs\_R6G\_UV irradiated (violet).

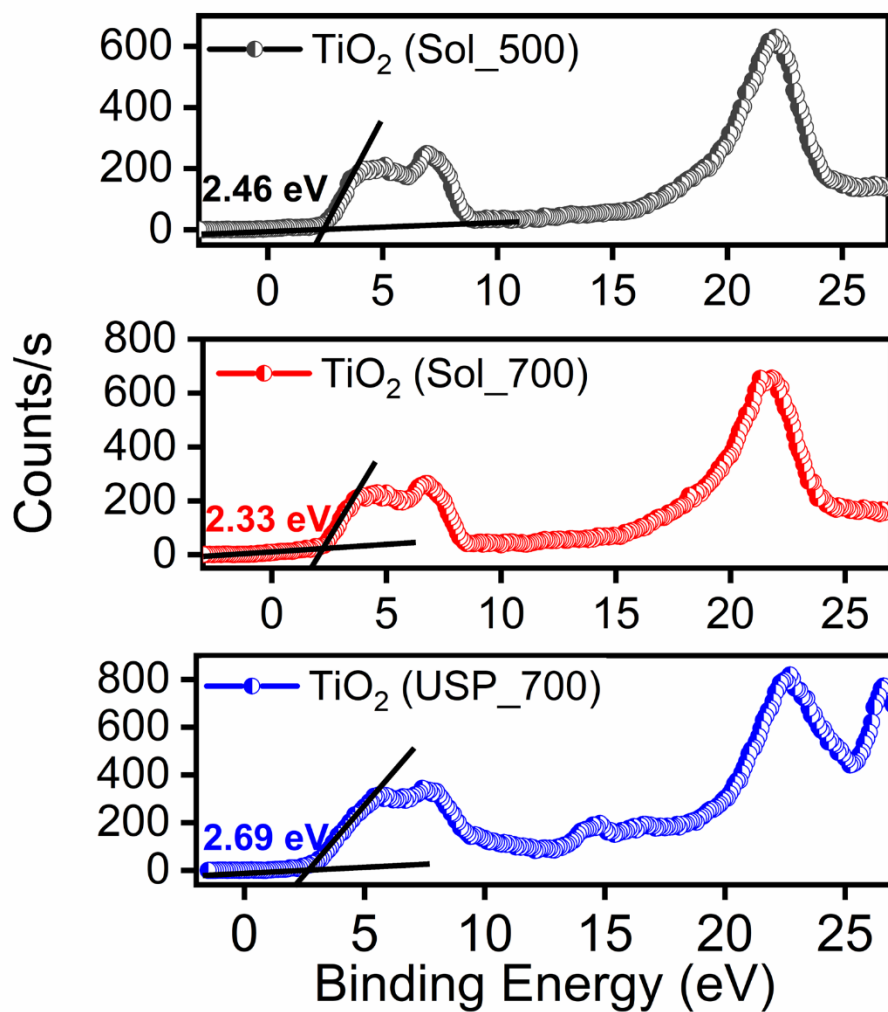

**Figure S8.** Valence band XPS spectra of TiO<sub>2</sub>\_500, TiO<sub>2</sub>\_700, and TiO<sub>2</sub>\_USP samples. The valence band edge was determined by extrapolating the linear portion of the leading edge to the baseline. The extracted VBM values are 2.46 eV for TiO<sub>2</sub>\_500, 2.33 eV for TiO<sub>2</sub>\_700, and 2.69 eV for TiO<sub>2</sub>\_USP, showing a clear shift in electronic states depending on the synthesis and treatment conditions.

## References

1. S. Ben-Jaber, W. J. Peveler, R. Quesada-Cabrera, E. Cortés, C. Sotelo-Vazquez, N. Abdul-Karim, S. A. Maier and I. P. Parkin, *Nature communications*, 2016, 7, 12189.
2. P. Hildebrandt and M. Stockburger, *The Journal of Physical Chemistry*, 1984, 88, 5935-5944.
3. D. Huang, J. Cui and X. Chen, *Colloids and Surfaces A: Physicochemical and Engineering Aspects*, 2014, 456, 100-107.
4. X. N. He, Y. Gao, M. Mahjouri-Samani, P. N. Black, J. Allen, M. Mitchell, W. Xiong, Y. S. Zhou, L. Jiang and Y. F. Lu, *Nanotechnology*, 2012, 23, 205702.
